# Supplementary material for: Holistic Assessment of Rumen Microbiome Dynamics through Quantitative Metatranscriptomics Reveals Multifunctional Redundancy during Key Steps of Anaerobic Feed Degradation
Source: PubMed Central journal article supplement (PMC6081794; doi:10.1128/msystems.00038-18), 2018-08-07

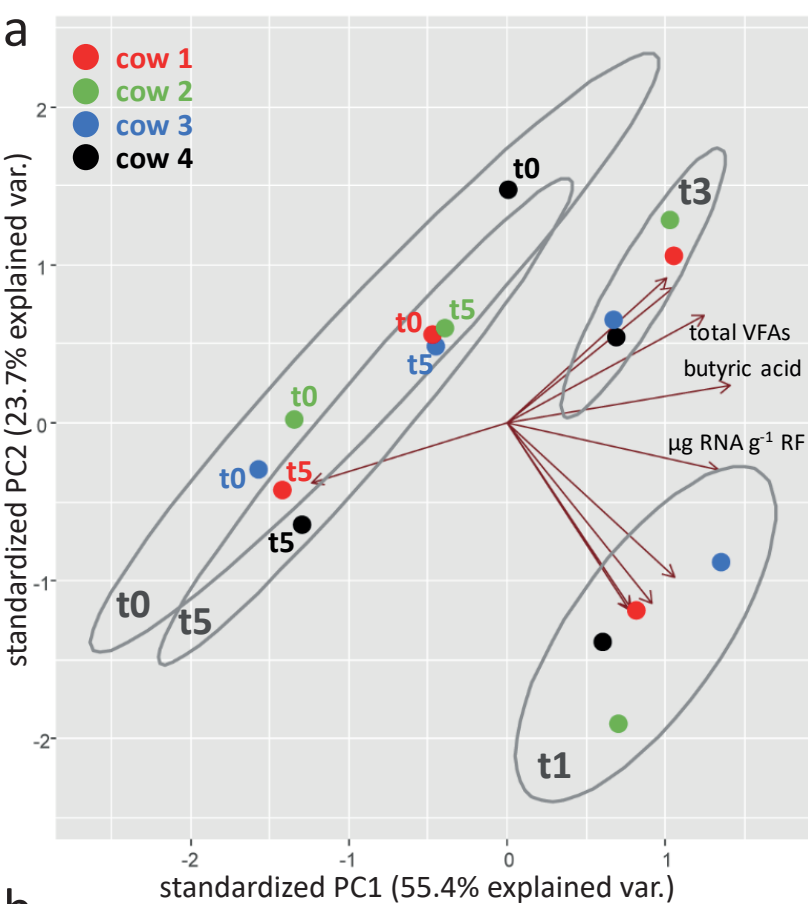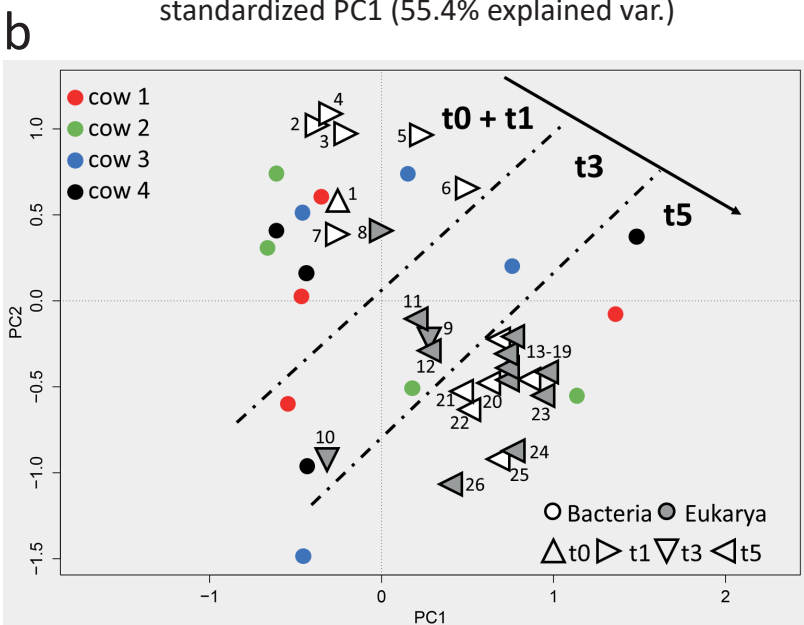

Supplement: sys004182253sf1.pdf [file sys004182253sf1.pdf]
