# Supplementary material for: Holistic Assessment of Rumen Microbiome Dynamics through Quantitative Metatranscriptomics Reveals Multifunctional Redundancy during Key Steps of Anaerobic Feed Degradation
Source: PubMed Central journal article supplement (PMC6081794; doi:10.1128/msystems.00038-18), 2018-08-07
Supplement: sys004182253st1.pdf [file sys004182253st1.pdf]

**Supplementary Table S1. Composition of the diet fed to the rumen-cannulated Holstein dairy cows.** Cows were fed twice a day in a semi-restrictive way (see Methods section and Fig. 1a).

| Dietary composition <sup>a</sup>       |       |
|----------------------------------------|-------|
| Spring barley                          | 217.9 |
| Rape seed cake (12% fat)               | 221.5 |
| Clover grass silage                    | 303.5 |
| Corn silage                            | 244.8 |
| Sodium Chloride                        | 1.6   |
| Vitamins and minerals                  | 10.2  |
| Chemical composition <sup>1</sup>      |       |
| Dry matter content [g/kg] <sup>b</sup> | 446   |
| Ash <sup>c</sup>                       | 65    |
| Crude protein <sup>d</sup>             | 157   |
| Fat <sup>e</sup>                       | 36    |
| Neutral detergent fibre <sup>f</sup>   | 340   |

<sup>a</sup> Given in g/kg DM if nothing else is stated. <sup>b</sup> The dry matter concentration was determined by drying the samples for 48 hours at 60°C. <sup>c</sup> Ash was determined by combustion at 525°C for 6 hours. <sup>d</sup> Nitrogen was determined by the Dumas principle as described by Hansen (1) using a Vario MAX CN (Elementar Analysensysteme GmbH, Hanau, Germany), and crude protein was calculated as N x 6.25. <sup>e</sup> Crude fat was measured by Soxhlet extraction with petroleum ether (Soltex 2050, Foss Analytical, Hillerød, Denmark) after hydrolysis with HCl (2). <sup>f</sup> Ash-free neutral detergent fibre was measured by Fibertec<sup>TM</sup> M 6 system (Foss Analytical, Hillerød, Denmark) using heat stable amylase and sodium sulphite as described by Mertens (3).

## References

1. Hansen B. 1989. Determination of nitrogen as elementary N, an alternative to Kjeldahl. *Acta Agr Scand* 39:113-118.
2. Stoldt W. 1952. Vorschlag zur Vereinheitlichung der Fettbestimmung in Lebensmitteln. *Fette Seifen* 54:206-207.
3. Mertens DR. 2002. Gravimetric determination of amylase-treated neutral detergent fiber in feeds with refluxing in beakers or crucibles: Collaborative study. *J AOAC Int* 85:1217-1240.
