# Supplementary material for: Holistic Assessment of Rumen Microbiome Dynamics through Quantitative Metatranscriptomics Reveals Multifunctional Redundancy during Key Steps of Anaerobic Feed Degradation
Source: PubMed Central journal article supplement (PMC6081794; doi:10.1128/msystems.00038-18), 2018-08-07
Supplement: sys004182253st3.pdf [file sys004182253st3.pdf]

**Supplementary Table S3. Overview of RNA extraction, sequencing and data processing results.**

| sample ID   | µg RNA <sup>a</sup> | raw sequences <sup>b</sup> |              |                     | SortMeRNA results <sup>d</sup> |            | annotation of mRNA |                   |
|-------------|---------------------|----------------------------|--------------|---------------------|--------------------------------|------------|--------------------|-------------------|
|             |                     | no. of read pairs          | no. of reads | average read length | rRNA reads                     | mRNA reads | DIAMOND            | Pfam <sup>e</sup> |
| c1_07h (t0) | 42.3                | 65,317,599                 | 60,466,622   | 214                 | 52,334,976                     | 8,131,646  | 3,365,969          | 410,419           |
| c2_07h (t0) | 35.1                | 59,186,503                 | 51,812,887   | 214                 | 42,488,514                     | 9,324,373  | 3,365,969          | 290,817           |
| c3_07h (t0) | 24.1                | 75,330,840                 | 53,433,658   | 215                 | 43,639,108                     | 9,794,550  | 3,365,969          | 368,829           |
| c4_07h (t0) | 35.0                | 53,259,101                 | 62,901,199   | 217                 | 52,540,980                     | 10,360,219 | 3,365,969          | 342,208           |
| c1_08h (t1) | 55.3                | 66,549,413                 | 59,656,114   | 209                 | 51,068,193                     | 8,587,921  | 3,365,969          | 491,989           |
| c2_08h (t1) | 64.3                | 67,146,045                 | 59,149,252   | 215                 | 50,666,579                     | 8,482,673  | 3,365,969          | 424,483           |
| c3_08h (t1) | 74.6                | 63,379,266                 | 53,417,765   | 198                 | 44,106,590                     | 9,311,175  | 3,365,969          | 417,605           |
| c4_08h (t1) | 82.6                | 63,533,899                 | 36,342,383   | 191                 | 29,672,369                     | 6,670,014  | 3,365,969          | 304,716           |
| c1_10h (t3) | 71.5                | 64,634,701                 | 58,801,041   | 219                 | 50,430,178                     | 8,370,863  | 3,365,969          | 542,244           |
| c2_10h (t3) | 50.2                | 66,938,760                 | 42,031,443   | 223                 | 35,888,902                     | 6,142,541  | 3,365,969          | 399,755           |
| c3_10h (t3) | 68.9                | 67,312,364                 | 58,695,012   | 207                 | 48,385,273                     | 10,309,739 | 3,365,969          | 384,594           |
| c4_10h (t3) | 89.3                | 65,740,801                 | 48,605,118   | 217                 | 42,611,059                     | 5,994,059  | 3,365,969          | 478,864           |
| c1_12h (t5) | 29.5                | 62,897,615                 | 58,136,430   | 224                 | 52,364,413                     | 5,772,017  | 3,365,969          | 467,908           |
| c2_12h (t5) | 39.6                | 66,954,185                 | 62,273,447   | 214                 | 54,042,405                     | 8,231,042  | 3,365,969          | 387,441           |
| c3_12h (t5) | 45.9                | 71,966,923                 | 50,534,927   | 221                 | 44,197,682                     | 6,337,245  | 3,365,969          | 370,793           |
| c4_12h (t5) | 32.8                | 62,238,171                 | 57,829,771   | 220                 | 49,765,881                     | 8,063,890  | 3,365,969          | 395,907           |

<sup>a</sup>µg RNA extracted per gram rumen fluid <sup>b</sup> read length 125 bp; sequenced on a Illumina HiSeq 2500 125 bp; <sup>c</sup> after overlapping the reads, trimming and quality filtering; <sup>d</sup> SortMeRNA separated

rRNA and putative mRNA reads based on the SILVA db; <sup>e</sup> number of reads annotated to a protein family from a subsample (2,000,000 reads) of total mRNA reads
