# Supplementary material for: Holistic Assessment of Rumen Microbiome Dynamics through Quantitative Metatranscriptomics Reveals Multifunctional Redundancy during Key Steps of Anaerobic Feed Degradation
Source: PubMed Central journal article supplement (PMC6081794; doi:10.1128/msystems.00038-18), 2018-08-07
Supplement: sys004182253st4.pdf [file sys004182253st4.pdf]

**Supplementary Table S4. Relative abundance<sup>a</sup> of eukaryotic, bacterial and archaeal SSU rRNA reads [%]. c1 - c4, cow 1 – 4.**

| taxon string                                                              | c1_t0 | c1_t1 | c1_t3 | c1_t5 | c2_t0 | c2_t1 | c2_t3 | c2_t5 | c3_t0 | c3_t1 | c3_t3 | c3_t5 | c4_t0 | c4_t1 | c4_t3 | c4_t5 |
|---------------------------------------------------------------------------|-------|-------|-------|-------|-------|-------|-------|-------|-------|-------|-------|-------|-------|-------|-------|-------|
| unassigned Eukaryota                                                      | 1.03  | 0.93  | 0.92  | 1.69  | 0.31  | 0.30  | 0.49  | 0.59  | 0.62  | 0.63  | 0.84  | 0.62  | 0.41  | 0.18  | 0.55  | 1.53  |
| Metazoa                                                                   | 0.33  | 0.55  | 0.68  | 0.73  | 0.20  | 0.21  | 0.29  | 0.32  | 0.37  | 0.53  | 0.65  | 0.50  | 0.40  | 0.22  | 0.58  | 1.14  |
| Alveolata; Apicomplexa; Aconoidasida; Piroplasmida                        | 0.53  | 0.73  | 0.61  | 0.73  | 0.12  | 0.14  | 0.19  | 0.21  | 0.26  | 0.53  | 0.52  | 0.38  | 0.36  | 0.27  | 0.39  | 0.96  |
| Alveolata; Ciliophora; Litostomatea; unassigned Litostomatea              | 0.12  | 0.14  | 0.19  | 0.18  | 0.02  | 0.02  | 0.03  | 0.01  | 0.06  | 0.06  | 0.11  | 0.05  | 0.07  | 0.06  | 0.14  | 0.12  |
| Alveolata; Ciliophora; Litostomatea; other Litostomatea                   | 0.03  | 0.06  | 0.04  | 0.04  | 0.00  | 0.00  | 0.00  | 0.00  | 0.02  | 0.01  | 0.02  | 0.02  | 0.01  | 0.01  | 0.04  | 0.02  |
| Alveolata; Ciliophora; Litostomatea; unassigned Entodiniomorpha           | 3.85  | 2.42  | 3.83  | 1.70  | 0.43  | 0.67  | 0.34  | 0.17  | 0.96  | 0.94  | 1.17  | 0.32  | 1.10  | 0.16  | 1.49  | 1.01  |
| Alveolata; Ciliophora; Litostomatea; unassigned Ophryoscolecidae          | 9.26  | 6.51  | 7.65  | 6.88  | 0.84  | 1.15  | 0.64  | 0.31  | 2.98  | 2.58  | 3.04  | 2.43  | 4.81  | 1.52  | 5.75  | 4.40  |
| Alveolata; Ciliophora; Litostomatea; Entodinium                           | 8.89  | 7.42  | 7.15  | 10.29 | 0.19  | 0.13  | 0.20  | 0.12  | 2.46  | 1.82  | 3.41  | 2.27  | 2.01  | 0.77  | 1.36  | 5.15  |
| Alveolata; Ciliophora; Litostomatea; Epidinium                            | 8.21  | 5.79  | 8.05  | 2.59  | 1.00  | 1.77  | 0.91  | 0.39  | 2.17  | 2.42  | 2.78  | 0.43  | 3.21  | 1.15  | 4.19  | 1.68  |
| Alveolata; Ciliophora; Litostomatea; Eremoplastron                        | 0.00  | 0.00  | 0.01  | 0.00  | 0.00  | 0.00  | 0.00  | 0.00  | 0.00  | 0.01  | 0.01  | 0.02  | 0.05  | 0.03  | 0.11  | 0.01  |
| Alveolata; Ciliophora; Litostomatea; Eudiplodinium                        | 0.00  | 0.00  | 0.01  | 0.00  | 0.00  | 0.00  | 0.00  | 0.00  | 0.00  | 0.01  | 0.01  | 0.00  | 0.02  | 0.02  | 0.09  | 0.01  |
| Alveolata; Ciliophora; Litostomatea; Isotricha                            | 4.07  | 8.04  | 5.71  | 3.50  | 1.19  | 1.73  | 1.01  | 0.95  | 5.39  | 4.95  | 4.33  | 9.79  | 2.03  | 9.16  | 18.69 | 5.32  |
| Alveolata; Ciliophora; Litostomatea; Dasytricha                           | 0.92  | 0.88  | 0.73  | 0.50  | 0.00  | 0.00  | 0.00  | 0.00  | 0.00  | 0.01  | 0.01  | 0.33  | 0.09  | 0.15  | 0.17  | 0.01  |
| Alveolata; Ciliophora; Spirotrichea; unassigned Spirotrichea              | 0.05  | 0.07  | 0.07  | 0.11  | 0.03  | 0.04  | 0.04  | 0.06  | 0.09  | 0.10  | 0.14  | 0.18  | 0.12  | 0.05  | 0.16  | 0.19  |
| Alveolata; Ciliophora; Colpodea; unassigned Colpodea                      | 0.02  | 0.02  | 0.01  | 0.02  | 0.01  | 0.02  | 0.02  | 0.03  | 0.01  | 0.02  | 0.03  | 0.01  | 0.01  | 0.01  | 0.00  | 0.02  |
| Alveolata; Ciliophora; Phyllopharyngea; Chonotrichia                      | 0.14  | 0.13  | 0.13  | 0.11  | 0.03  | 0.05  | 0.03  | 0.04  | 0.23  | 0.32  | 0.18  | 0.09  | 0.12  | 0.06  | 0.13  | 0.52  |
| Alveolata; low abundant Alveolata                                         | 0.05  | 0.04  | 0.05  | 0.10  | 0.05  | 0.03  | 0.02  | 0.03  | 0.04  | 0.04  | 0.05  | 0.02  | 0.03  | 0.02  | 0.04  | 0.05  |
| Fungi; unassigned Fungi                                                   | 0.03  | 0.04  | 0.06  | 0.06  | 0.01  | 0.00  | 0.00  | 0.01  | 0.02  | 0.02  | 0.01  | 0.02  | 0.02  | 0.00  | 0.01  | 0.02  |
| Fungi; Dikarya; unassigned Dikarya                                        | 0.06  | 0.09  | 0.04  | 0.08  | 0.07  | 0.08  | 0.08  | 0.14  | 0.03  | 0.08  | 0.08  | 0.04  | 0.05  | 0.07  | 0.05  | 0.11  |
| Fungi; Dikarya; Ascomycota                                                | 0.08  | 0.42  | 0.13  | 0.16  | 0.13  | 0.31  | 0.27  | 0.21  | 0.13  | 0.34  | 0.22  | 0.14  | 0.29  | 0.21  | 0.13  | 0.13  |
| Fungi; Dikarya; Basidiomycota                                             | 0.05  | 0.05  | 0.03  | 0.07  | 0.03  | 0.03  | 0.02  | 0.05  | 0.11  | 0.09  | 0.08  | 0.07  | 0.08  | 0.03  | 0.07  | 0.18  |
| Fungi; Chytridiomycota                                                    | 0.02  | 0.03  | 0.02  | 0.04  | 0.02  | 0.01  | 0.01  | 0.03  | 0.01  | 0.01  | 0.01  | 0.02  | 0.02  | 0.01  | 0.01  | 0.03  |
| Fungi; Neocallimastigomycota; Neocallimastigomycetes; Neocallimastigaceae | 1.29  | 2.19  | 2.18  | 3.09  | 0.44  | 0.42  | 0.23  | 0.32  | 0.99  | 0.68  | 0.83  | 1.12  | 0.67  | 0.38  | 0.66  | 1.16  |
| Fungi; low abundant Fungi                                                 | 0.00  | 0.00  | 0.00  | 0.00  | 0.00  | 0.00  | 0.00  | 0.00  | 0.00  | 0.00  | 0.00  | 0.00  | 0.00  | 0.00  | 0.00  | 0.01  |
| Parabasalia; unassigned Parabasalia                                       | 0.00  | 0.00  | 0.00  | 0.01  | 0.81  | 0.55  | 0.89  | 1.52  | 0.11  | 0.08  | 0.13  | 1.44  | 0.41  | 0.25  | 0.58  | 0.29  |
| Parabasalia; Trichomonadida; Trichomonadidae                              | 0.05  | 0.03  | 0.06  | 0.11  | 4.92  | 4.38  | 5.27  | 11.16 | 0.79  | 0.59  | 1.04  | 13.14 | 2.05  | 2.49  | 4.90  | 2.68  |
| Parabasalia; Hypotrichomonadida                                           | 0.07  | 0.04  | 0.02  | 0.08  | 0.01  | 0.01  | 0.00  | 0.02  | 0.13  | 0.14  | 0.15  | 0.01  | 0.01  | 0.00  | 0.01  | 0.28  |
| Parabasalia; low abundant Parabasalia                                     | 0.00  | 0.00  | 0.00  | 0.00  | 0.01  | 0.00  | 0.00  | 0.00  | 0.00  | 0.00  | 0.00  | 0.00  | 0.01  | 0.00  | 0.00  | 0.00  |
| Stramenopiles                                                             | 0.02  | 0.04  | 0.04  | 0.04  | 0.02  | 0.01  | 0.01  | 0.02  | 0.01  | 0.02  | 0.03  | 0.02  | 0.02  | 0.00  | 0.02  | 0.02  |
| Viridiplantae                                                             | 0.08  | 0.07  | 0.05  | 0.08  | 0.11  | 0.10  | 0.14  | 0.25  | 0.07  | 0.06  | 0.09  | 0.11  | 0.07  | 0.06  | 0.07  | 0.18  |
| Rhizaria                                                                  | 0.08  | 0.07  | 0.12  | 0.12  | 0.03  | 0.02  | 0.03  | 0.04  | 0.09  | 0.14  | 0.29  | 0.11  | 0.06  | 0.04  | 0.10  | 0.30  |
| Amoebozoa; unassigned Amoebozoa                                           | 0.01  | 0.01  | 0.01  | 0.02  | 0.02  | 0.02  | 0.02  | 0.04  | 0.01  | 0.01  | 0.02  | 0.02  | 0.00  | 0.01  | 0.02  | 0.04  |
| Amoebozoa; Tubulinea; unassigned Tubulinea                                | 0.02  | 0.02  | 0.02  | 0.02  | 0.02  | 0.01  | 0.03  | 0.04  | 0.01  | 0.01  | 0.02  | 0.01  | 0.01  | 0.02  | 0.01  | 0.03  |
| Amoebozoa; Archamoebae; Mastigamoebidae; Mastigamoeba                     | 0.50  | 0.33  | 0.39  | 0.64  | 0.47  | 0.48  | 0.61  | 0.81  | 0.26  | 0.38  | 0.39  | 0.37  | 0.24  | 0.14  | 0.36  | 0.84  |
| Amoebozoa; Flabellinea; Vannellidae                                       | 0.08  | 0.07  | 0.07  | 0.13  | 0.01  | 0.01  | 0.02  | 0.02  | 0.03  | 0.02  | 0.07  | 0.03  | 0.01  | 0.03  | 0.02  | 0.08  |
| Amoebozoa; low abundant Amoebozoa                                         | 0.00  | 0.00  | 0.01  | 0.01  | 0.01  | 0.02  | 0.01  | 0.01  | 0.01  | 0.00  | 0.00  | 0.01  | 0.01  | 0.00  | 0.01  | 0.00  |
| Glaucocystophyceae                                                        | 0.04  | 0.04  | 0.04  | 0.06  | 0.01  | 0.01  | 0.00  | 0.00  | 0.00  | 0.01  | 0.01  | 0.00  | 0.00  | 0.00  | 0.00  | 0.01  |
| Eccrinales                                                                | 0.01  | 0.02  | 0.02  | 0.03  | 0.00  | 0.01  | 0.02  | 0.01  | 0.01  | 0.01  | 0.01  | 0.01  | 0.00  | 0.00  | 0.01  | 0.02  |
| low abundant Eukaryota                                                    | 0.03  | 0.03  | 0.04  | 0.08  | 0.02  | 0.02  | 0.02  | 0.04  | 0.02  | 0.03  | 0.04  | 0.02  | 0.01  | 0.00  | 0.02  | 0.09  |
| unassigned Bacteria                                                       | 0.04  | 0.09  | 0.04  | 0.11  | 0.10  | 0.12  | 0.11  | 0.09  | 0.16  | 0.22  | 0.20  | 0.16  | 0.11  | 0.17  | 0.12  | 0.18  |
| Proteobacteria; unassigned Proteobacteria                                 | 0.00  | 0.02  | 0.02  | 0.03  | 0.01  | 0.08  | 0.24  | 0.16  | 0.02  | 0.21  | 0.35  | 0.01  | 0.05  | 0.29  | 0.04  | 0.08  |
| Proteobacteria; Gammaproteobacteria; unassigned Gammaproteobacteria       | 0.00  | 0.02  | 0.01  | 0.02  | 0.03  | 0.05  | 0.12  | 0.04  | 0.01  | 0.05  | 0.07  | 0.01  | 0.03  | 0.03  | 0.02  | 0.02  |



|                                                                                           |      |      |      |      |      |       |       |      |      |      |      |      |      |      |      |      |
|-------------------------------------------------------------------------------------------|------|------|------|------|------|-------|-------|------|------|------|------|------|------|------|------|------|
| Tenericutes; Mollicutes; Anaeroplasmatales; Anaeroplasmataceae                            | 0.60 | 0.43 | 0.61 | 1.16 | 0.18 | 0.22  | 0.29  | 0.28 | 0.52 | 0.50 | 0.45 | 0.53 | 0.35 | 0.25 | 0.24 | 0.56 |
| Tenericutes; Mollicutes; other Mollicutes                                                 | 0.02 | 0.03 | 0.03 | 0.11 | 0.28 | 0.21  | 0.23  | 0.21 | 0.28 | 0.25 | 0.26 | 0.36 | 0.45 | 0.28 | 0.29 | 0.32 |
| Tenericutes; low abundant Tenericutes                                                     | 0.02 | 0.02 | 0.01 | 0.03 | 0.01 | 0.01  | 0.01  | 0.03 | 0.02 | 0.02 | 0.03 | 0.01 | 0.02 | 0.01 | 0.01 | 0.03 |
| RF3                                                                                       | 0.04 | 0.02 | 0.02 | 0.06 | 0.01 | 0.00  | 0.02  | 0.02 | 0.04 | 0.04 | 0.03 | 0.02 | 0.02 | 0.00 | 0.00 | 0.03 |
| Lentisphaerae; Lentisphaeria; Victivallales; Victivallaceae                               | 0.01 | 0.02 | 0.01 | 0.03 | 0.13 | 0.18  | 0.18  | 0.26 | 0.13 | 0.16 | 0.18 | 0.23 | 0.08 | 0.09 | 0.07 | 0.18 |
| Lentisphaerae; Lentisphaeria; RFP12 gut group                                             | 0.09 | 0.11 | 0.09 | 0.19 | 0.22 | 0.30  | 0.38  | 0.45 | 0.30 | 0.34 | 0.37 | 0.71 | 0.25 | 0.39 | 0.29 | 0.33 |
| Lentisphaerae; low abundant Lentisphaerae                                                 | 0.01 | 0.00 | 0.00 | 0.00 | 0.01 | 0.00  | 0.00  | 0.00 | 0.01 | 0.01 | 0.00 | 0.01 | 0.00 | 0.01 | 0.01 | 0.01 |
| Spirochaetes; Spirochaetes (class); Spirochaetales; Spirochaetaceae                       | 1.63 | 2.16 | 2.13 | 3.93 | 4.32 | 6.21  | 6.00  | 6.17 | 3.23 | 5.20 | 4.51 | 3.12 | 3.16 | 2.72 | 2.11 | 3.31 |
| Spirochaetes; Spirochaetes (class); Spirochaetales; PL-11B10                              | 0.00 | 0.00 | 0.00 | 0.00 | 0.00 | 0.00  | 0.00  | 0.00 | 0.10 | 0.20 | 0.21 | 0.04 | 0.03 | 0.03 | 0.02 | 0.30 |
| Spirochaetes; low abundant Spirochaetes                                                   | 0.00 | 0.00 | 0.00 | 0.00 | 0.00 | 0.00  | 0.00  | 0.00 | 0.00 | 0.00 | 0.00 | 0.00 | 0.00 | 0.00 | 0.00 | 0.00 |
| Candidate division TM7                                                                    | 0.02 | 0.02 | 0.02 | 0.01 | 0.15 | 0.10  | 0.11  | 0.10 | 0.05 | 0.05 | 0.05 | 0.07 | 0.09 | 0.07 | 0.07 | 0.04 |
| Synergistetes; Synergista; Synergistales; Synergistaceae                                  | 0.06 | 0.09 | 0.05 | 0.05 | 0.03 | 0.06  | 0.02  | 0.02 | 0.06 | 0.06 | 0.06 | 0.02 | 0.03 | 0.06 | 0.02 | 0.03 |
| Elusimicrobia; Elusimicrobia (class); Elusimicrobiales; Elusimicrobiaceae                 | 0.01 | 0.00 | 0.00 | 0.01 | 0.19 | 0.21  | 0.21  | 0.17 | 0.08 | 0.08 | 0.13 | 0.23 | 0.20 | 0.16 | 0.12 | 0.14 |
| Elusimicrobia; low abundant Elusimicrobia                                                 | 0.01 | 0.00 | 0.01 | 0.01 | 0.00 | 0.00  | 0.00  | 0.00 | 0.01 | 0.01 | 0.01 | 0.01 | 0.00 | 0.00 | 0.01 | 0.01 |
| Candidate division SR1                                                                    | 0.00 | 0.00 | 0.00 | 0.00 | 0.03 | 0.02  | 0.02  | 0.02 | 0.10 | 0.13 | 0.11 | 0.12 | 0.15 | 0.15 | 0.12 | 0.13 |
| Fibrobacteres; Fibrobacteria; Fibrobacteriales; Fibrobacteraceae                          | 0.70 | 1.47 | 1.13 | 1.48 | 3.65 | 11.18 | 11.46 | 8.65 | 2.84 | 5.15 | 5.17 | 7.50 | 2.95 | 4.64 | 3.60 | 4.60 |
| Fibrobacteres; low abundant Fibrobacteres                                                 | 0.00 | 0.00 | 0.00 | 0.00 | 0.00 | 0.00  | 0.00  | 0.00 | 0.00 | 0.00 | 0.00 | 0.00 | 0.00 | 0.00 | 0.00 | 0.00 |
| Candidate division TM6                                                                    | 0.01 | 0.02 | 0.02 | 0.03 | 0.00 | 0.00  | 0.00  | 0.00 | 0.01 | 0.01 | 0.02 | 0.03 | 0.02 | 0.01 | 0.02 | 0.04 |
| low abundant Bacteria                                                                     | 0.01 | 0.02 | 0.02 | 0.02 | 0.02 | 0.01  | 0.02  | 0.02 | 0.03 | 0.04 | 0.02 | 0.03 | 0.02 | 0.02 | 0.02 | 0.03 |
| Euryarchaeota; Thermoplasmata; Methanomassiliococcales; Methanomassiliococcales GIT clade | 0.16 | 0.23 | 0.20 | 0.36 | 0.20 | 0.22  | 0.23  | 0.24 | 0.13 | 0.14 | 0.12 | 0.11 | 0.19 | 0.12 | 0.10 | 0.14 |
| Euryarchaeota; Thermoplasmata; Thermoplasmatales; unassigned Thermoplasmatales            | 0.00 | 0.00 | 0.00 | 0.00 | 0.00 | 0.00  | 0.00  | 0.00 | 0.00 | 0.00 | 0.00 | 0.00 | 0.00 | 0.00 | 0.00 | 0.00 |
| Euryarchaeota; Methanobacteria; Methanobacteriales; unassigned Methanobacteriaceae        | 0.03 | 0.03 | 0.02 | 0.06 | 0.02 | 0.01  | 0.01  | 0.01 | 0.03 | 0.03 | 0.03 | 0.02 | 0.01 | 0.02 | 0.01 | 0.03 |
| Euryarchaeota; Methanobacteria; Methanobacteriales; Methanobrevibacter                    | 0.10 | 0.08 | 0.06 | 0.17 | 0.19 | 0.13  | 0.10  | 0.17 | 0.09 | 0.10 | 0.12 | 0.18 | 0.21 | 0.15 | 0.09 | 0.11 |
| Euryarchaeota; Methanobacteria; Methanobacteriales; Methanosphaera                        | 0.01 | 0.01 | 0.01 | 0.01 | 0.02 | 0.02  | 0.01  | 0.01 | 0.00 | 0.00 | 0.01 | 0.01 | 0.01 | 0.01 | 0.00 | 0.02 |
| Euryarchaeota; Methanomicrobia; Methanosarcinales; Methanosarcinaceae                     | 0.00 | 0.00 | 0.00 | 0.00 | 0.00 | 0.00  | 0.00  | 0.00 | 0.00 | 0.00 | 0.00 | 0.00 | 0.00 | 0.00 | 0.00 | 0.00 |

<sup>a</sup> Taxa which could not be assigned on family level and/or showed relative abundance  $\leq 0.01$  % level are shown on higher taxonomic levels
