# Supplementary material for: Holistic Assessment of Rumen Microbiome Dynamics through Quantitative Metatranscriptomics Reveals Multifunctional Redundancy during Key Steps of Anaerobic Feed Degradation
Source: PubMed Central journal article supplement (PMC6081794; doi:10.1128/msystems.00038-18), 2018-08-07
Supplement: sys004182253st5.pdf [file sys004182253st5.pdf]

**Supplementary Table S5. Significantly higher expressed functions one hour after ruminant feed intake.**

| Fig. 3<br>ID | Differential gene expression analysis (edgeR)                    |       |                  | SEED subsystems             |                                    |                                                             |
|--------------|------------------------------------------------------------------|-------|------------------|-----------------------------|------------------------------------|-------------------------------------------------------------|
|              | SEED functions (level 4)                                         | logFC | FDR <sup>a</sup> | level 1                     | level 2                            | level 3                                                     |
| 1            | Fumarate reductase subunit C                                     | 4.70  | ***              | Respiration                 | Electron donating reactions        | Succinate_dehydrogenase                                     |
| 2            | Putative phosphatase YqaB                                        | 3.76  | **               | DNA Metabolism              | DNA repair                         | 2-phosphoglycolate_salvage                                  |
| 3            | Lipid A biosynthesis (KDO) 2-(lauroyl)-lipid IVA acyltransferase | 2.68  | *                | Cell Wall and Capsule       | Gram-Negative cell wall components | KDO2-Lipid_A_biosynthesis                                   |
| 4            | DNA-directed RNA polymerase subunit B (EC 2.7.7.6)               | 2.18  | **               | RNA Metabolism              | Transcription                      | RNA_polymerase_archaeal                                     |
| 5            | DNA-directed RNA polymerase subunit N (EC 2.7.7.6)               | 2.01  | ***              | RNA Metabolism              | Transcription                      | RNA_polymerase_archaeal                                     |
| 6            | LSU ribosomal protein L7Ae                                       | 1.49  | **               | Protein Metabolism          | Protein biosynthesis               | Ribosome_LSU_bacterial                                      |
| 7            | 3-hydroxybutyryl-CoA dehydratase (EC 4.2.1.55)                   | 1.34  | *                | Carbohydrates               | Fermentation                       | Acetyl-CoA_fermentation_to_Butyrate                         |
| 8            | Phosphoenolpyruvate carboxykinase [ATP] (EC 4.1.1.49)            | 1.18  | **               | Carbohydrates               | Central carbohydrate metabolism    | Pyruvate_metabolism_I:_anaplerotic_reactions,_PEP           |
| 9            | Na()-translocating NADH-quinone reductase subunit F              | 1.17  | *                | Respiration                 | Electron donating reactions        | Na()-translocating_NADH-quinone_oxidoreductase <sup>b</sup> |
| 10           | LSU ribosomal protein L14p (L23e)                                | 1.11  | ***              | Protein Metabolism          | Protein biosynthesis               | Ribosome_LSU_bacterial                                      |
| 11           | Na()-translocating NADH-quinone reductase subunit C              | 1.03  | **               | Respiration                 | Electron donating reactions        | Na()-translocating_NADH-quinone_oxidoreductase <sup>b</sup> |
| 12           | NADH-ubiquinone oxidoreductase chain L (EC 1.6.5.3)              | 1.01  | **               | Respiration                 | Electron donating reactions        | Respiratory_Complex_I                                       |
| 13           | Choline binding protein A                                        | 1.00  | **               | Stress Response             | Osmotic stress                     | Choline_and_Betaine_Uptake_and_Betaine_Biosynthesis         |
| 14           | Cysteine desulfurase (EC 2.8.1.7), NifS subfamily                | 1.00  | *                | Amino Acids and Derivatives | Alanine, serine, and glycine       | Alanine_biosynthesis                                        |
| 15           | 6-phospho-beta-glucosidase (EC 3.2.1.86)                         | 0.92  | *                | Carbohydrates               | Di- and oligosaccharides           | Beta-Glucoside_Metabolism                                   |
| 16           | LSU ribosomal protein L24p (L26e)                                | 0.89  | ***              | Protein Metabolism          | Protein biosynthesis               | Ribosome_LSU_bacterial                                      |
| 17           | LSU ribosomal protein L10p (P0)                                  | 0.87  | **               | Protein Metabolism          | Protein biosynthesis               | Ribosome_LSU_bacterial                                      |
| 18           | LSU ribosomal protein L31p                                       | 0.84  | **               | Protein Metabolism          | Protein biosynthesis               | Ribosome_LSU_bacterial                                      |
| 19           | LSU ribosomal protein L27p                                       | 0.82  | **               | Protein Metabolism          | Protein biosynthesis               | Ribosome_LSU_bacterial                                      |
| 20           | SSU ribosomal protein S8p (S15Ae)                                | 0.80  | ***              | Protein Metabolism          | Protein biosynthesis               | Ribosome_SSU_bacterial                                      |
| 21           | SSU ribosomal protein S4p (S9e)                                  | 0.79  | ***              | Protein Metabolism          | Protein biosynthesis               | Ribosome_SSU_bacterial                                      |
| 22           | LSU ribosomal protein L18p (L5e)                                 | 0.78  | **               | Protein Metabolism          | Protein biosynthesis               | Ribosome_LSU_bacterial                                      |
| 23           | SSU ribosomal protein S5p (S2e)                                  | 0.77  | ***              | Protein Metabolism          | Protein biosynthesis               | Ribosome_SSU_bacterial                                      |
| 24           | SSU ribosomal protein S3p (S3e)                                  | 0.76  | ***              | Protein Metabolism          | Protein biosynthesis               | Ribosome_SSU_bacterial                                      |
| 25           | SSU ribosomal protein S16p                                       | 0.75  | **               | Protein Metabolism          | Protein biosynthesis               | Ribosome_SSU_bacterial                                      |
| 26           | Biosynthetic arginine decarboxylase (EC 4.1.1.19)                | 0.75  | *                | Stress Response             | Acid stress                        | Acid_resistance_mechanisms                                  |
| 27           | SSU ribosomal protein S11p (S14e)                                | 0.73  | **               | Protein Metabolism          | Protein biosynthesis               | Ribosome_SSU_bacterial                                      |
| 28           | Ketol-acid reductoisomerase (EC 1.1.1.86)                        | 0.71  | *                | Amino Acids and Derivatives | Branched-chain amino acids         | Branched-Chain_Amino_Acid_Biosynthesis                      |
| 29           | LSU ribosomal protein L17p                                       | 0.70  | **               | Protein Metabolism          | Protein biosynthesis               | Ribosome_LSU_bacterial                                      |
| 30           | SSU ribosomal protein S13p (S18e)                                | 0.69  | **               | Protein Metabolism          | Protein biosynthesis               | Ribosome_SSU_bacterial                                      |
| 31           | Translation elongation factor G                                  | 0.68  | **               | Protein Metabolism          | Protein biosynthesis               | Universal_GTPases                                           |
| 32           | SSU ribosomal protein S14p (S29e)                                | 0.68  | **               | Protein Metabolism          | Protein biosynthesis               | Ribosome_SSU_bacterial                                      |
| 33           | LSU ribosomal protein L11p (L12e)                                | 0.68  | *                | Protein Metabolism          | Protein biosynthesis               | Ribosome_LSU_bacterial                                      |
| 34           | LSU ribosomal protein L1p (L10Ae)                                | 0.67  | **               | Protein Metabolism          | Protein biosynthesis               | Ribosome_LSU_bacterial                                      |
| 35           | LSU ribosomal protein L3p (L3e)                                  | 0.67  | **               | Protein Metabolism          | Protein biosynthesis               | Ribosome_LSU_bacterial                                      |
| 36           | LSU ribosomal protein L5p (L11e)                                 | 0.66  | **               | Protein Metabolism          | Protein biosynthesis               | Ribosome_LSU_bacterial                                      |
| 37           | SSU ribosomal protein S18p                                       | 0.65  | *                | Protein Metabolism          | Protein biosynthesis               | Ribosome_SSU_bacterial                                      |
| 38           | LSU ribosomal protein L30p (L7e)                                 | 0.65  | *                | Protein Metabolism          | Protein biosynthesis               | Ribosome_LSU_bacterial                                      |
| 39           | LSU ribosomal protein L16p (L10e)                                | 0.62  | **               | Protein Metabolism          | Protein biosynthesis               | Ribosome_LSU_bacterial                                      |
| 40           | LSU ribosomal protein L33p                                       | 0.62  | *                | Protein Metabolism          | Protein biosynthesis               | Ribosome_LSU_bacterial                                      |
| 41           | SSU ribosomal protein S1p                                        | 0.54  | *                | Protein Metabolism          | Protein biosynthesis               | Ribosome_SSU_bacterial                                      |
| 42           | SSU ribosomal protein S17p (S11e)                                | 0.52  | *                | Protein Metabolism          | Protein biosynthesis               | Ribosome_SSU_bacterial                                      |
| 43           | SSU ribosomal protein S9p (S16e)                                 | 0.50  | *                | Protein Metabolism          | Protein biosynthesis               | Ribosome_SSU_bacterial                                      |

<sup>a</sup>FDR, corrected p-value, \*\*\* ≤ 0.001, \*\* ≤ 0.01, \* ≤ 0.05; <sup>b</sup>Na()-translocating\_NADH-quinone\_oxidoreductase\_and\_rnf-like\_group\_of\_electron\_transport\_complexes
