# Supplementary material for: Holistic Assessment of Rumen Microbiome Dynamics through Quantitative Metatranscriptomics Reveals Multifunctional Redundancy during Key Steps of Anaerobic Feed Degradation
Source: PubMed Central journal article supplement (PMC6081794; doi:10.1128/msystems.00038-18), 2018-08-07
Supplement: sys004182253st6.pdf [file sys004182253st6.pdf]

**Supplementary Table S6. Raw count data of carbohydrate active enzymes detected in the rumen metatranscriptomes. c1 - c4, cow 1 - 4; 7h (t0), 8h (t1), 10h (t3), 12h (t5)**

| Category                        | pfam model | name            | c1 7h | c2 7h | c3 7h | c4 7h | c1 8h | c2 8h | c3 8h | c4 8h | c1 10h | c2 10h | c3 10h | c4 10h | c1 12h | c2 12h | c3 12h | c4 12h |
|---------------------------------|------------|-----------------|-------|-------|-------|-------|-------|-------|-------|-------|--------|--------|--------|--------|--------|--------|--------|--------|
| Lignin - phenolics              | PF02578.10 | Cu-oxidase_4    | 47    | 27    | 49    | 30    | 61    | 42    | 54    | 36    | 65     | 43     | 57     | 32     | 54     | 41     | 47     | 45     |
|                                 | PF00775.16 | Dioxygenase_C   | 0     | 0     | 0     | 0     | 0     | 0     | 0     | 1     | 0      | 0      | 0      | 0      | 0      | 0      | 0      | 0      |
| Cellulases                      | PF12876.2  | Cellulase_like  | 1     | 1     | 2     | 1     | 1     | 6     | 0     | 0     | 1      | 4      | 2      | 0      | 0      | 3      | 1      | 1      |
|                                 | PF00150.13 | Cellulase       | 1419  | 404   | 537   | 834   | 901   | 747   | 732   | 441   | 1239   | 473    | 387    | 1544   | 692    | 351    | 522    | 525    |
|                                 | PF01341.12 | Glyco_hydro_6   | 3     | 1     | 2     | 1     | 2     | 3     | 1     | 2     | 4      | 1      | 4      | 0      | 8      | 2      | 2      | 5      |
|                                 | PF00759.14 | Glyco_hydro_9   | 2370  | 546   | 655   | 1123  | 1232  | 1033  | 922   | 725   | 1641   | 644    | 562    | 2273   | 804    | 489    | 570    | 629    |
|                                 | PF02011.10 | Glyco_hydro_48  | 68    | 276   | 125   | 208   | 55    | 267   | 209   | 183   | 58     | 372    | 242    | 223    | 119    | 338    | 212    | 236    |
|                                 | PF12891.2  | Glyco_hydro_44  | 0     | 14    | 9     | 12    | 2     | 12    | 7     | 5     | 1      | 16     | 16     | 9      | 7      | 24     | 7      | 12     |
|                                 | PF02015.11 | Glyco_hydro_45  | 2390  | 301   | 575   | 1224  | 1491  | 861   | 732   | 566   | 2096   | 246    | 392    | 2731   | 1174   | 151    | 560    | 439    |
| Hemicellulases                  | PF01270.12 | Glyco_hydro_8   | 14    | 39    | 48    | 63    | 16    | 52    | 41    | 32    | 17     | 68     | 49     | 51     | 41     | 75     | 100    | 74     |
|                                 | PF00331.15 | Glyco_hydro_10  | 1197  | 450   | 522   | 593   | 968   | 517   | 557   | 373   | 1319   | 412    | 393    | 816    | 747    | 381    | 478    | 454    |
|                                 | PF00457.12 | Glyco_hydro_11  | 395   | 113   | 120   | 216   | 274   | 129   | 143   | 128   | 297    | 99     | 88     | 367    | 201    | 123    | 147    | 146    |
|                                 | PF02156.10 | Glyco_hydro_26  | 444   | 119   | 149   | 258   | 262   | 219   | 207   | 144   | 451    | 130    | 159    | 450    | 250    | 120    | 155    | 153    |
|                                 | PF00295.12 | Glyco_hydro_28  | 79    | 35    | 56    | 38    | 84    | 34    | 54    | 29    | 93     | 35     | 46     | 37     | 79     | 35     | 51     | 53     |
|                                 | PF07745.8  | Glyco_hydro_53  | 143   | 77    | 183   | 98    | 104   | 96    | 151   | 95    | 179    | 112    | 127    | 84     | 184    | 105    | 137    | 154    |
| Pectinases                      | PF00295    | Glyco_hydro_28  | 79    | 35    | 56    | 38    | 84    | 34    | 54    | 29    | 93     | 35     | 46     | 37     | 79     | 35     | 51     | 53     |
| Chitinases                      | PF00704    | Glyco_hydro_18  | 111   | 9     | 26    | 23    | 49    | 18    | 25    | 7     | 82     | 15     | 27     | 43     | 110    | 23     | 24     | 26     |
| Glucosylceramidase              | PF02055    | Glyco_hydro_30  | 100   | 17    | 29    | 52    | 63    | 16    | 18    | 14    | 70     | 8      | 10     | 78     | 44     | 10     | 25     | 18     |
|                                 | PF06964.7  | Alpha-L-AF_C    | 178   | 78    | 190   | 88    | 163   | 122   | 144   | 85    | 236    | 73     | 103    | 77     | 165    | 110    | 131    | 125    |
|                                 | PF09206.6  | ArabFuran-catal | 2     | 6     | 2     | 2     | 0     | 4     | 2     | 1     | 0      | 5      | 3      | 1      | 3      | 7      | 5      | 1      |
|                                 | PF07477.7  | Glyco_hydro_67C | 48    | 32    | 29    | 27    | 41    | 27    | 33    | 41    | 57     | 11     | 33     | 26     | 65     | 24     | 42     | 22     |
|                                 | PF07488.7  | Glyco_hydro_67M | 74    | 22    | 57    | 31    | 55    | 34    | 54    | 27    | 97     | 14     | 46     | 27     | 70     | 23     | 55     | 51     |
|                                 | PF03648.9  | Glyco_hydro_67N | 2     | 1     | 3     | 0     | 3     | 2     | 1     | 0     | 3      | 3      | 3      | 1      | 3      | 0      | 2      | 3      |
|                                 | PF05592.6  | Bac_rhamnosid   | 127   | 41    | 104   | 54    | 85    | 55    | 98    | 49    | 124    | 55     | 77     | 89     | 103    | 53     | 81     | 79     |
|                                 | PF08531.5  | Bac_rhamnosid_N | 45    | 28    | 38    | 16    | 28    | 14    | 31    | 19    | 46     | 22     | 17     | 22     | 38     | 26     | 33     | 22     |
| Starch degrading enzymes        | PF00128    | Alpha-amylase   | 792   | 390   | 477   | 492   | 696   | 519   | 665   | 515   | 1097   | 524    | 674    | 882    | 1167   | 543    | 596    | 702    |
|                                 | PF03065    | Glyco_hydro_57  | 221   | 77    | 156   | 69    | 123   | 83    | 122   | 85    | 275    | 86     | 112    | 85     | 233    | 88     | 119    | 133    |
|                                 | PF02446    | Glyco_hydro_77  | 651   | 413   | 513   | 549   | 651   | 802   | 975   | 497   | 1307   | 888    | 817    | 831    | 1075   | 717    | 423    | 650    |
| Mannan, Galactomannan degrading | PF02156    | Glyco_hydro_26  | 444   | 119   | 149   | 258   | 262   | 219   | 207   | 144   | 451    | 130    | 159    | 450    | 250    | 120    | 155    | 153    |
|                                 | PF03663    | Glyco_hydro_76  | 10    | 3     | 6     | 0     | 7     | 1     | 0     | 2     | 7      | 1      | 4      | 5      | 6      | 2      | 6      | 5      |
| Oligosaccharide hydrolases      | PF00232.13 | Glyco_hydro_1   | 58    | 56    | 78    | 51    | 98    | 98    | 74    | 46    | 95     | 55     | 42     | 47     | 158    | 83     | 88     | 81     |
|                                 | PF00703.16 | Glyco_hydro_2   | 96    | 43    | 94    | 56    | 49    | 53    | 60    | 41    | 110    | 46     | 65     | 72     | 82     | 61     | 91     | 60     |
|                                 | PF02836.12 | Glyco_hydro_2_C | 327   | 163   | 252   | 169   | 225   | 205   | 261   | 175   | 368    | 186    | 223    | 227    | 316    | 235    | 308    | 248    |
|                                 | PF02837.13 | Glyco_hydro_2_N | 298   | 158   | 284   | 183   | 204   | 193   | 264   | 148   | 351    | 194    | 201    | 195    | 309    | 211    | 294    | 227    |
|                                 | PF00933.16 | Glyco_hydro_3   | 644   | 440   | 559   | 414   | 583   | 382   | 564   | 509   | 717    | 393    | 470    | 828    | 758    | 483    | 721    | 491    |
|                                 | PF01915.17 | Glyco_hydro_3_C | 343   | 184   | 305   | 215   | 325   | 205   | 297   | 240   | 418    | 200    | 186    | 403    | 412    | 226    | 381    | 256    |
|                                 | PF01120.12 | Alpha_L_fucos   | 86    | 39    | 74    | 41    | 58    | 40    | 65    | 49    | 68     | 36     | 50     | 35     | 78     | 66     | 71     | 67     |
|                                 | PF01301.14 | Glyco_hydro_35  | 73    | 29    | 66    | 35    | 45    | 39    | 67    | 56    | 75     | 36     | 58     | 39     | 67     | 42     | 60     | 60     |
|                                 | PF01074.17 | Glyco_hydro_38  | 9     | 6     | 12    | 9     | 8     | 12    | 9     | 6     | 17     | 5      | 8      | 8      | 8      | 8      | 15     | 14     |

| Categorie                                | pfam model | name             | c1 7h | c2 7h | c3 7h | c4 7h | c1 8h | c2 8h | c3 8h | c4 8h | c1 10h | c2 10h | c3 10h | c4 10h | c1 12h | c2 12h | c3 12h | c4 12h |
|------------------------------------------|------------|------------------|-------|-------|-------|-------|-------|-------|-------|-------|--------|--------|--------|--------|--------|--------|--------|--------|
| Oligosaccharide hydrolases               | PF07748.8  | Glyco_hydro_38_C | 2     | 4     | 6     | 1     | 3     | 2     | 0     | 3     | 5      | 3      | 2      | 0      | 2      | 1      | 5      | 4      |
|                                          | PF01229.12 | Glyco_hydro_39   | 4     | 3     | 6     | 3     | 4     | 3     | 6     | 0     | 2      | 4      | 1      | 5      | 3      | 4      | 6      | 7      |
|                                          | PF02449.10 | Glyco_hydro_42   | 9     | 12    | 14    | 14    | 10    | 16    | 17    | 15    | 8      | 15     | 17     | 3      | 14     | 14     | 18     | 15     |
|                                          | PF08533.5  | Glyco_hydro_42_C | 0     | 3     | 0     | 0     | 0     | 2     | 0     | 0     | 0      | 1      | 1      | 2      | 0      | 1      | 2      | 2      |
|                                          | PF04616.9  | Glyco_hydro_43   | 749   | 265   | 486   | 410   | 658   | 342   | 444   | 278   | 845    | 273    | 363    | 487    | 674    | 331    | 516    | 407    |
|                                          | PF07470    | Glyco_hydro_88   | 236   | 70    | 228   | 108   | 183   | 109   | 175   | 116   | 280    | 95     | 128    | 143    | 213    | 100    | 170    | 132    |
|                                          | PF03632    | Glyco_hydro_65m  | 8     | 3     | 9     | 4     | 3     | 3     | 8     | 4     | 2      | 5      | 15     | 5      | 4      | 6      | 4      | 6      |
|                                          | PF02065    | Melibiose        | 158   | 98    | 138   | 105   | 211   | 131   | 135   | 105   | 193    | 96     | 95     | 125    | 146    | 136    | 116    | 111    |
| PF01204                                  | Trehalase  | 2                | 5     | 2     | 4     | 0     | 3     | 5     | 0     | 1     | 1      | 1      | 1      | 4      | 3      | 6      | 4      |        |
| Other glycoside hydrolases               | PF02056    | Glyco_hydro_4    | 6     | 5     | 2     | 9     | 13    | 10    | 4     | 4     | 6      | 5      | 10     | 5      | 9      | 5      | 10     | 6      |
|                                          | PF00722    | Glyco_hydro_16   | 129   | 50    | 58    | 52    | 121   | 85    | 66    | 57    | 93     | 57     | 55     | 78     | 187    | 75     | 101    | 91     |
|                                          | PF00728    | Glyco_hydro_20   | 88    | 29    | 42    | 33    | 46    | 22    | 42    | 34    | 56     | 22     | 46     | 46     | 49     | 28     | 56     | 52     |
|                                          | PF01055    | Glyco_hydro_31   | 465   | 172   | 347   | 241   | 428   | 248   | 339   | 251   | 615    | 186    | 268    | 341    | 503    | 196    | 317    | 284    |
|                                          | PF00251    | Glyco_hydro_32N  | 374   | 133   | 197   | 167   | 212   | 161   | 182   | 289   | 185    | 90     | 149    | 567    | 217    | 94     | 391    | 203    |
|                                          | PF02012    | BNR              | 2     | 5     | 0     | 2     | 0     | 5     | 2     | 0     | 0      | 5      | 1      | 1      | 1      | 0      | 2      | 1      |
|                                          | PF03200    | Glyco_hydro_63   | 0     | 0     | 0     | 2     | 1     | 0     | 0     | 1     | 1      | 1      | 3      | 3      | 1      | 1      | 0      | 3      |
|                                          | PF03639    | Glyco_hydro_81   | 0     | 0     | 1     | 0     | 1     | 1     | 1     | 1     | 2      | 0      | 1      | 0      | 1      | 1      | 1      | 2      |
| PF05089                                  | NAGLU      | 37               | 55    | 33    | 37    | 39    | 37    | 43    | 38    | 37    | 15     | 46     | 22     | 38     | 37     | 33     | 46     |        |
| PF03562                                  | MltA       | 0                | 1     | 0     | 0     | 0     | 0     | 0     | 1     | 1     | 2      | 1      | 2      | 0      | 0      | 2      | 3      |        |
| Lysozymes                                | PF01183    | Glyco_hydro_25   | 187   | 112   | 186   | 171   | 178   | 180   | 142   | 131   | 223    | 113    | 151    | 361    | 245    | 125    | 182    | 196    |
| Cellulose binding                        | PF00553    | CBM_2            | 2     | 0     | 2     | 1     | 1     | 1     | 3     | 1     | 1      | 3      | 3      | 2      | 4      | 2      | 1      | 1      |
|                                          | PF00942    | CBM_3            | 31    | 5     | 9     | 15    | 15    | 14    | 6     | 5     | 25     | 4      | 2      | 19     | 10     | 11     | 6      | 9      |
|                                          | PF02018    | CBM_4_9          | 76    | 100   | 71    | 78    | 64    | 112   | 80    | 51    | 91     | 118    | 60     | 99     | 89     | 120    | 104    | 93     |
|                                          | PF03425    | CBM_11           | 1     | 19    | 6     | 10    | 4     | 9     | 10    | 13    | 2      | 38     | 18     | 18     | 7      | 33     | 24     | 11     |
| Chitin binding                           | PF02839    | CBM_5_12         | 40    | 0     | 18    | 16    | 18    | 7     | 21    | 16    | 43     | 6      | 13     | 39     | 20     | 2      | 2      | 14     |
| Starch binding                           | PF00686    | CBM_20           | 96    | 20    | 58    | 41    | 66    | 67    | 81    | 40    | 174    | 74     | 64     | 60     | 142    | 55     | 42     | 65     |
|                                          | PF02903    | Alpha-amylase_N  | 3     | 5     | 1     | 8     | 19    | 8     | 9     | 8     | 18     | 14     | 7      | 3      | 10     | 6      | 4      | 5      |
|                                          | PF03423    | CBM_25           | 0     | 0     | 3     | 0     | 0     | 1     | 0     | 0     | 0      | 1      | 0      | 0      | 0      | 2      | 1      | 1      |
| Oligosaccharide binding                  | PF03422    | CBM_6            | 212   | 164   | 143   | 170   | 164   | 171   | 145   | 128   | 219    | 201    | 147    | 218    | 176    | 207    | 206    | 173    |
| Other carbohydrate binding modules (CBM) | PF00652    | Ricin_B_lectin   | 24    | 11    | 5     | 11    | 10    | 15    | 3     | 5     | 8      | 12     | 5      | 18     | 7      | 12     | 13     | 6      |
|                                          | PF00754    | F5_F8_type_C     | 35    | 24    | 37    | 20    | 27    | 12    | 19    | 11    | 37     | 21     | 12     | 19     | 30     | 30     | 17     | 30     |
|                                          | PF08305    | NPCBM            | 3     | 4     | 6     | 12    | 3     | 10    | 5     | 2     | 8      | 6      | 9      | 9      | 3      | 9      | 11     | 8      |
| Bacterial cell wall degradation (CBM)    | PF01476    | LysM             | 213   | 138   | 257   | 202   | 213   | 176   | 249   | 169   | 283    | 222    | 301    | 181    | 261    | 259    | 253    | 333    |
